# Supplementary material
Source: Royal Society of Chemistry journal article supplement (doi:10.1039/d6nr00495d)
Supplement: d6nr00495d1.pdf [file d6nr00495d1.pdf]

## Supplementary Information

# Multiscale Charge-Carrier Dynamics Governed by Surface Energetics in Facet-Engineered NaNbO<sub>3</sub>/FeVO<sub>4</sub> Photoanodes

Nitika Garg,<sup>a</sup> Pabitra Kumar Nayak,<sup>a</sup> Ambika Prasad Kar,<sup>a</sup> Sandeep Kumar,<sup>a,c</sup>  
Dibyajyoti Ghosh,<sup>a,b</sup> Pramit K. Chowdhury,<sup>a</sup> and Ashok K. Ganguli<sup>a,d\*</sup>

<sup>a</sup> Department of Chemistry, Indian Institute of Technology Delhi, New Delhi 110016, India

<sup>b</sup> Department of Materials Science and Engineering, Indian Institute of Technology Delhi, New Delhi 110016, India

<sup>c</sup> Department of Chemistry, Motilal Nehru College, University of Delhi, Benito Juarez Marg, South Campus, New Delhi 110021, India

<sup>d</sup> Department of Chemical Sciences, Indian Institute of Science Education and Research Berhampur, Ganjam, Odisha-760003, India

\* Corresponding author e-mail: [ashok@chemistry.iitd.ac.in](mailto:ashok@chemistry.iitd.ac.in)

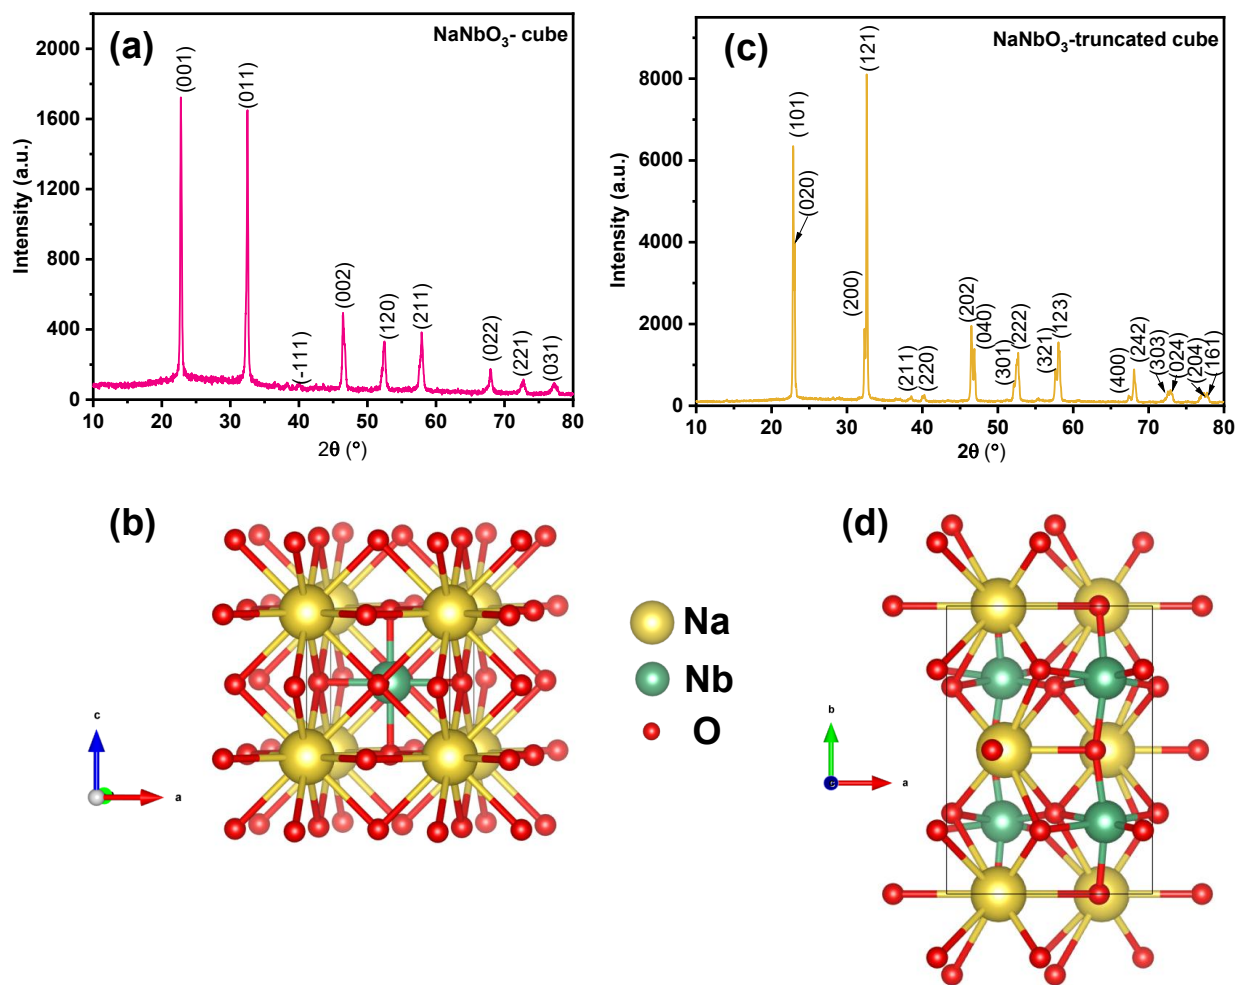

**Figure S1:** Indexed PXRD pattern of (a) NaNbO<sub>3</sub>-1 (cube) and (c) NaNbO<sub>3</sub>-2 (truncated cube). The corresponding crystal structure for (b) NaNbO<sub>3</sub>-1 (cube) and (d) NaNbO<sub>3</sub>-2 (truncated cube).

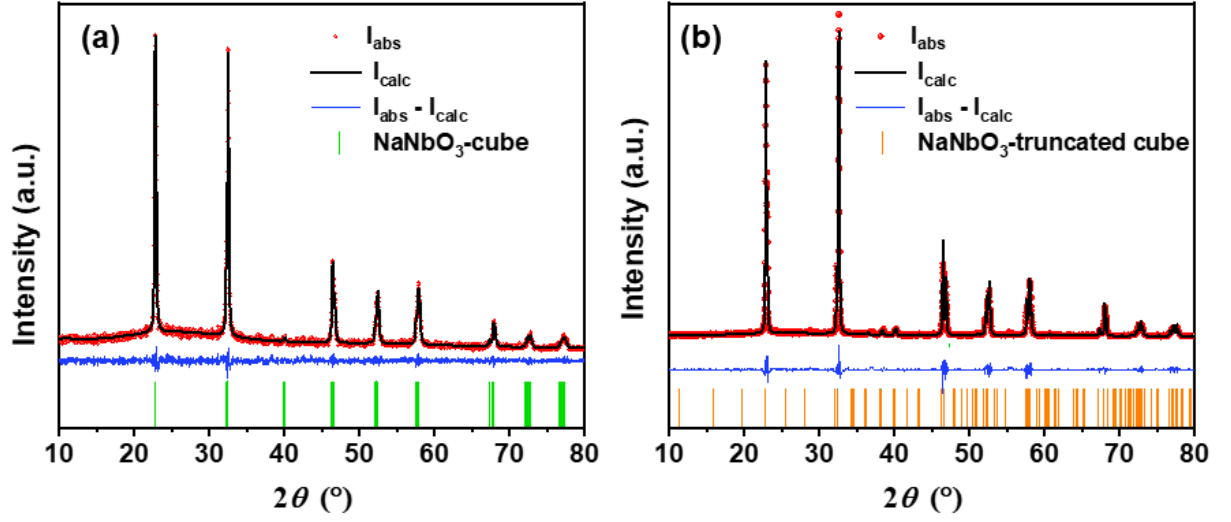

**Figure S2:** Rietveld refined powder x-ray pattern of (a)  $\text{NaNbO}_3$ -cube and (b)  $\text{NaNbO}_3$ -truncated cube.

**Table S1:** Crystallographic details of  $\text{NaNbO}_3$ -1 (cube) and  $\text{NaNbO}_3$ -2 (truncated cube) from Rietveld refinement.

| Parameter          | $\text{NaNbO}_3$ -1 (cube) | $\text{NaNbO}_3$ -2 (truncated cube) |
|--------------------|----------------------------|--------------------------------------|
| Space group        | P2/m                       | $P2_1ma$                             |
| Space group number | 10                         | 26                                   |
| $a$ (Å)            | 3.9187(3)                  | 5.5148(1)                            |
| $b$ (Å)            | 3.8932(2)                  | 7.7777(1)                            |
| $c$ (Å)            | 3.9119(3)                  | 5.5698(4)                            |
| $\alpha$ (°)       | 90.000                     | 90.000                               |
| $\beta$ (°)        | 89.487(7)                  | 90.000                               |
| $\gamma$ (°)       | 90.000                     | 90.000                               |

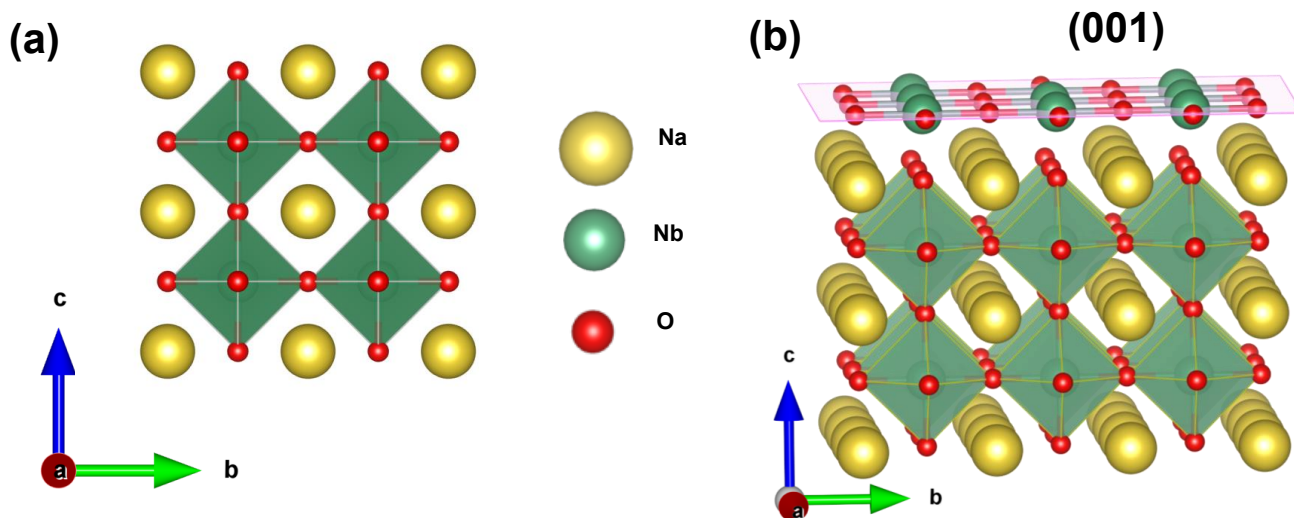

**Figure S3:** (a) Crystal structure of NaNbO<sub>3-1</sub> (cube) and (b) corresponding (001) exposed plane in monoclinic crystal system of NaNbO<sub>3-1</sub> (cube).

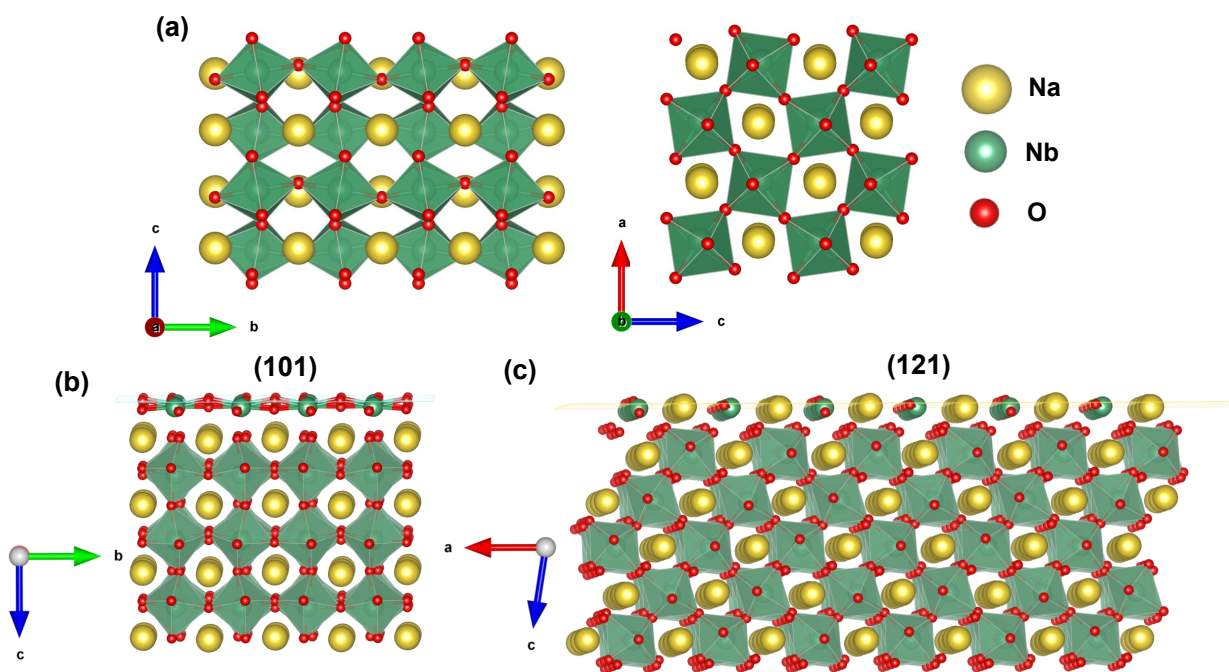

**Figure S4:** (a) Crystal structure of NaNbO<sub>3-2</sub> (truncated cube), corresponding exposed planes (b) (101) and (c) (121) in orthorhombic crystal system of NaNbO<sub>3-2</sub> (truncated cube).

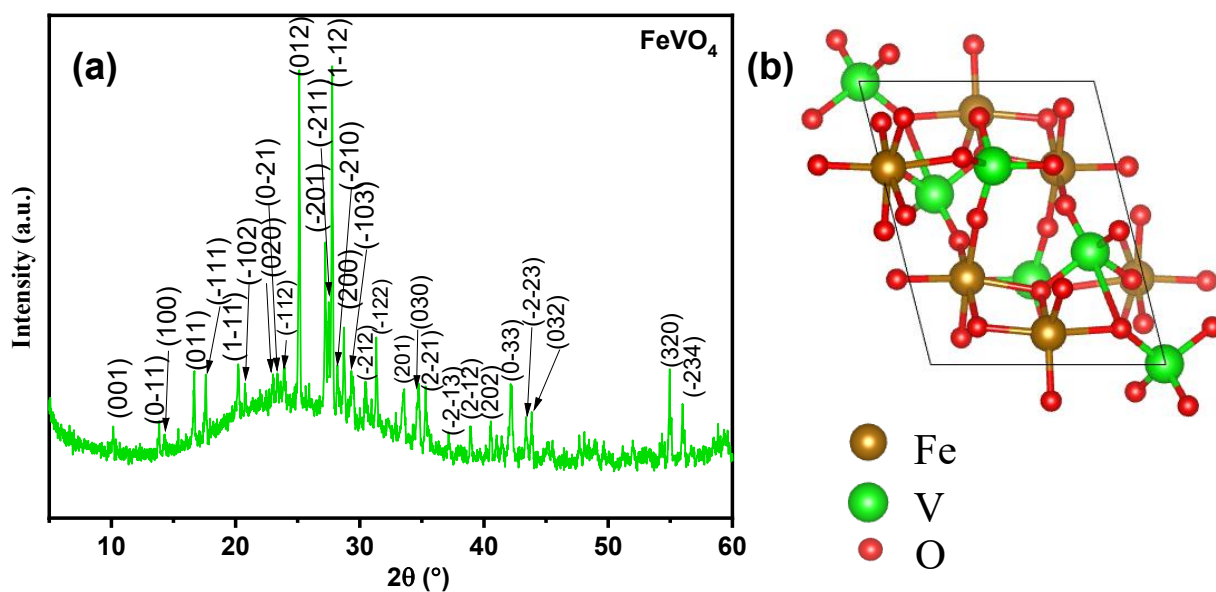

Figure S5: (a) Indexed PXRD pattern and (b) the corresponding crystal structure of  $\text{FeVO}_4$ .

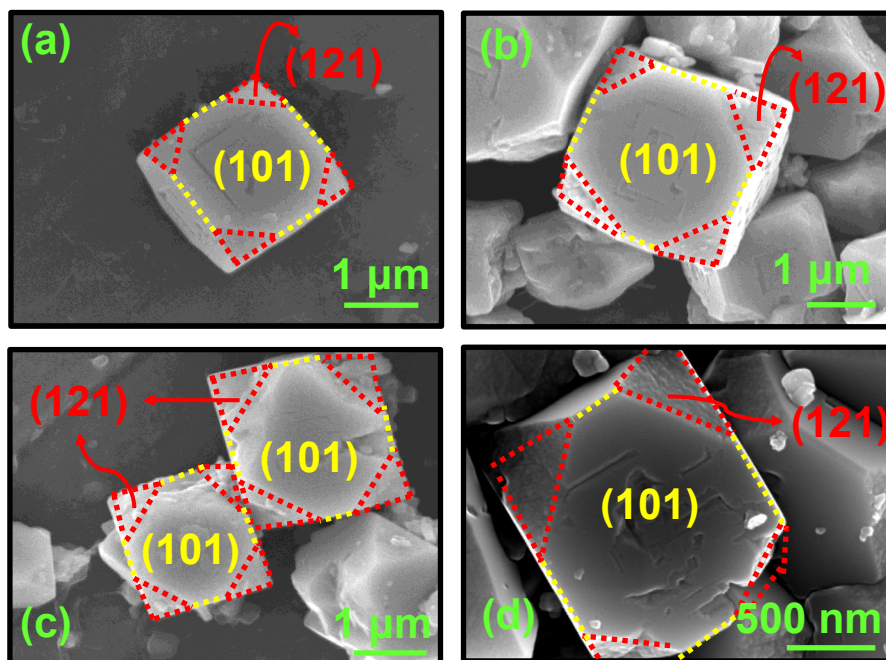

Figure S6: FESEM images of  $\text{NaNbO}_3$ -truncated cube recorded at different magnifications. (a)-(d) show the characteristic truncated-cube morphology, where the facets have been labelled, highlighting the coexistence of multiple exposed crystallographic facets.

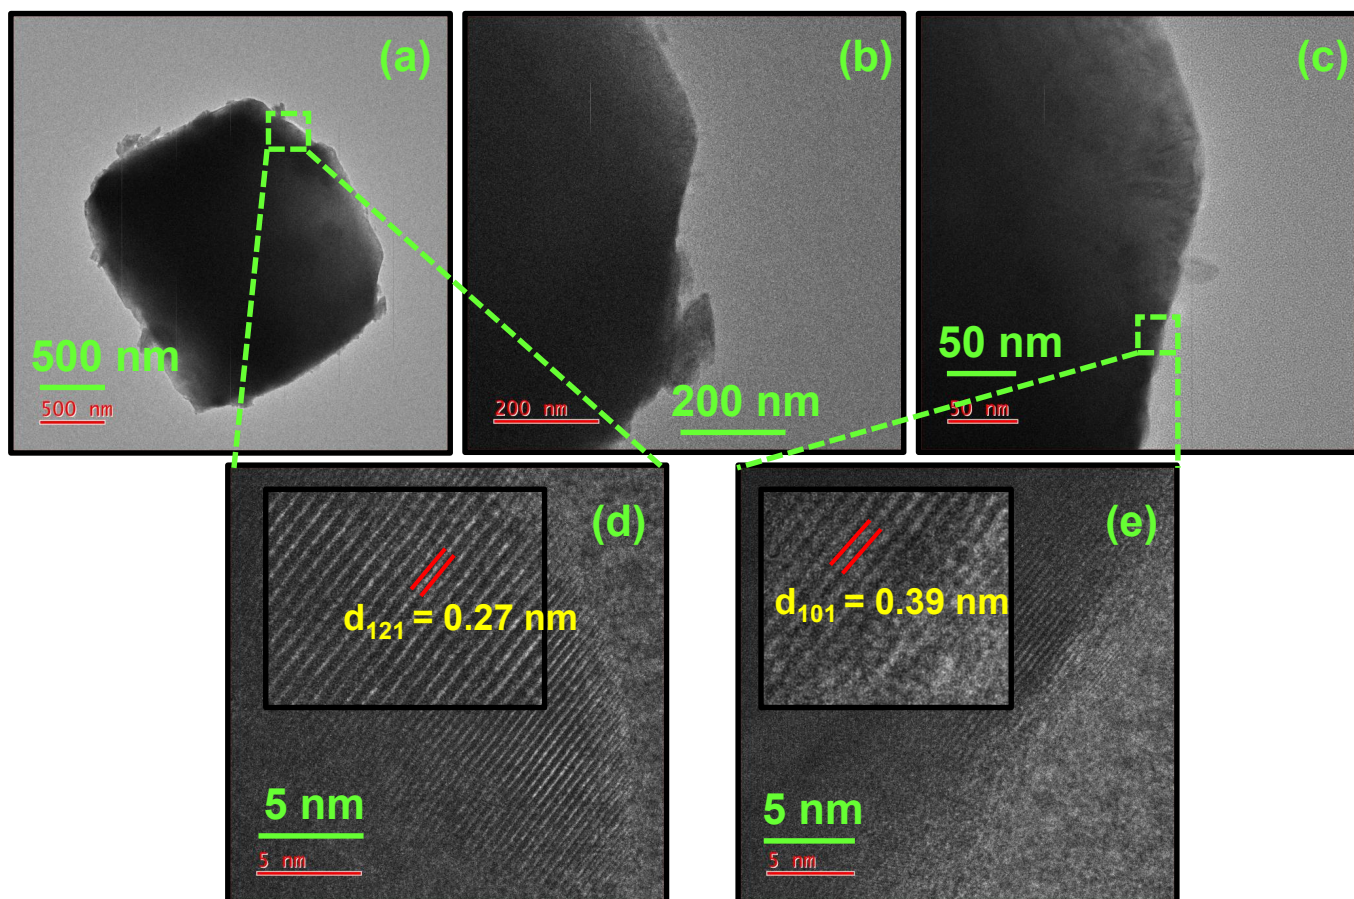

**Figure S7:** TEM and HRTEM images of NaNbO<sub>3</sub>-truncated cube at different magnifications. (a-c) show the particle morphology and the regions selected for lattice analysis, while (d) and (e) present the corresponding magnified HRTEM images with measured lattice spacings of 0.27 nm and 0.39 nm, indexed to the (121) and (101) planes, respectively.

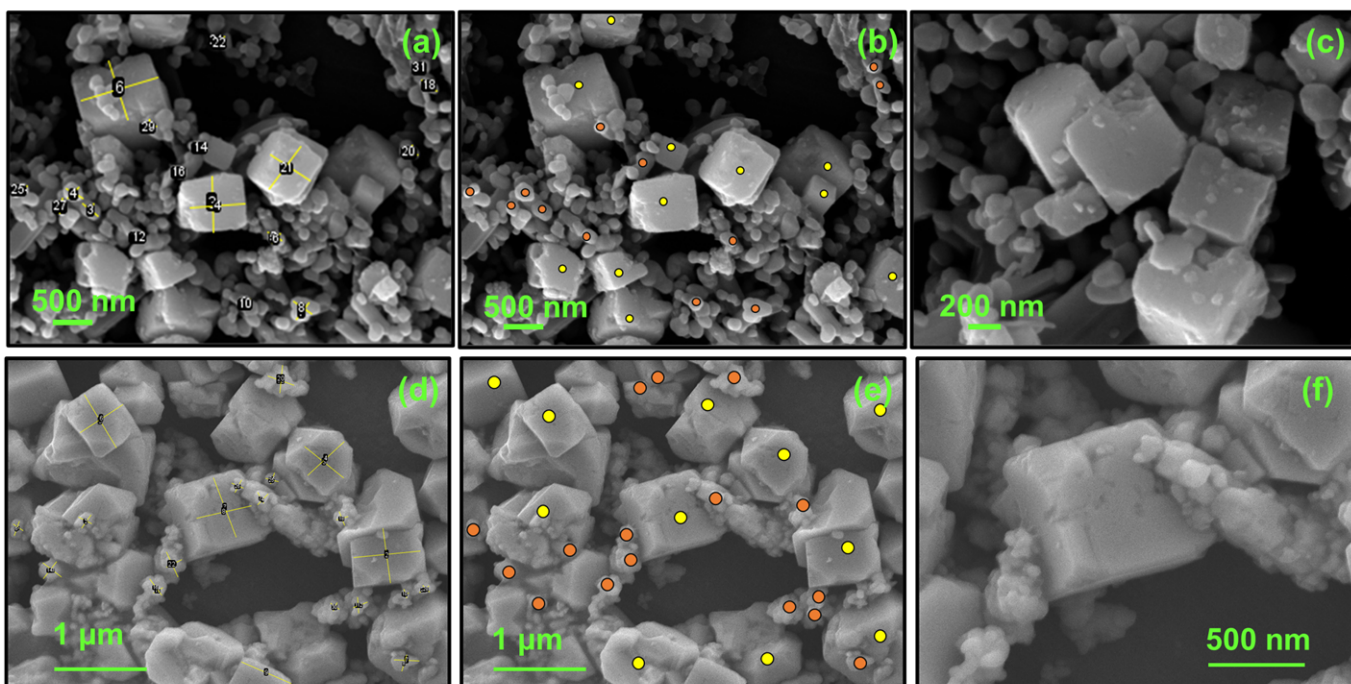

**Figure S8:** Representative SEM micrographs used for the semi-quantitative population analysis of particle morphologies in the  $\text{NaNbO}_3/\text{FeVO}_4$  heterostructures. **(a-c)**  $\text{NaNbO}_3$ -cube/ $\text{FeVO}_4$  sample and **(d-f)**  $\text{NaNbO}_3$ -truncated cube/ $\text{FeVO}_4$  sample at different magnifications. **(a)** and **(d)** show the identification and size measurement of faceted plate-like crystals, while panels **(b)** and **(e)** illustrate the particle counting used for population estimation, where yellow and orange markers indicate faceted plates and irregular particles, respectively.

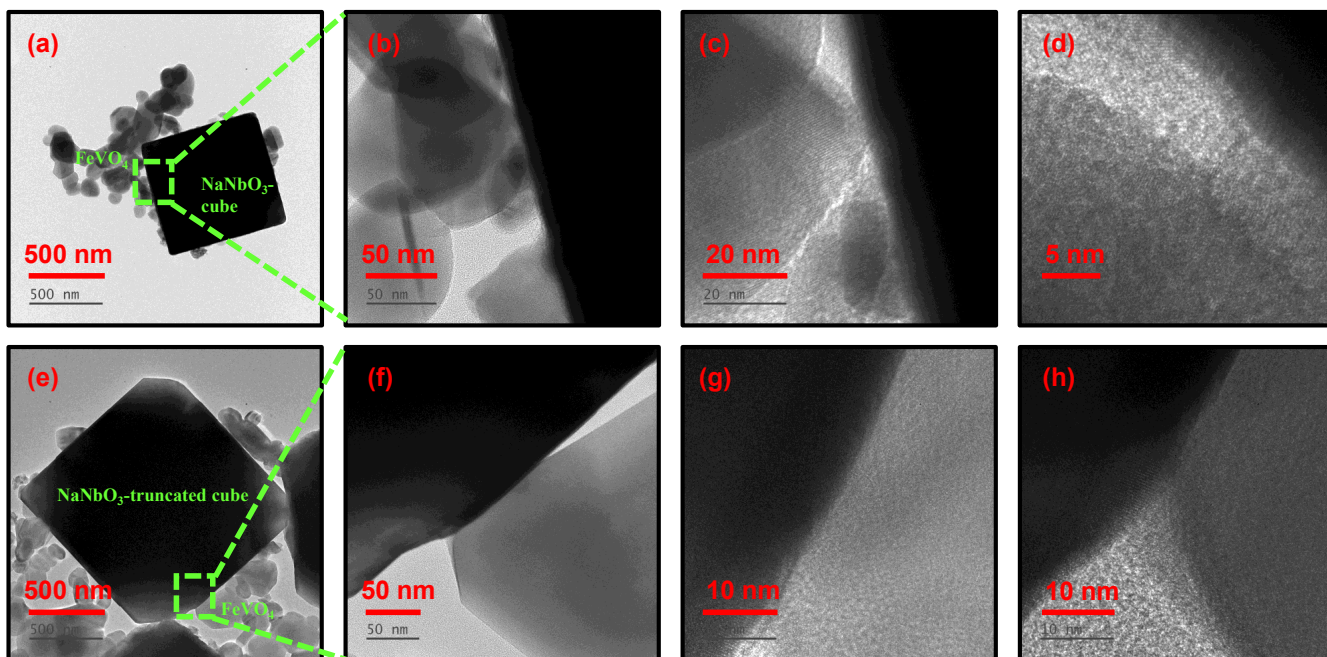

**Figure S9:** HRTEM micrographs of **(a-d)**  $\text{NaNbO}_3$ -cube/ $\text{FeVO}_4$ , **(e-h)**  $\text{NaNbO}_3$ -truncated cube/ $\text{FeVO}_4$  at different magnifications.

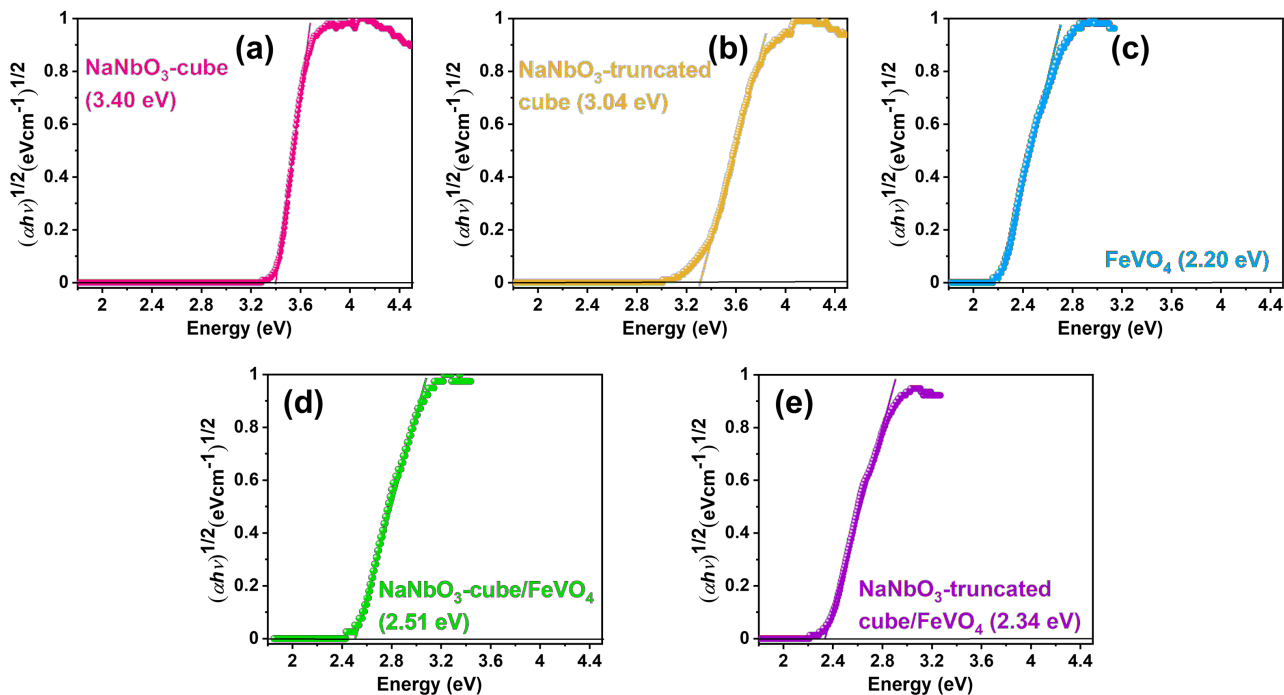

**Figure S10:** Tauc plots for (a)  $\text{NaNbO}_3$ -cube, (b)  $\text{NaNbO}_3$ -truncated cube, (c)  $\text{FeVO}_4$ , (d)  $\text{NaNbO}_3$ -cube/ $\text{FeVO}_4$ , and (e)  $\text{NaNbO}_3$ -truncated cube/ $\text{FeVO}_4$ , showing estimated band gap energies of 3.40, 3.04, 2.20, 2.51, and 2.34 eV, respectively.

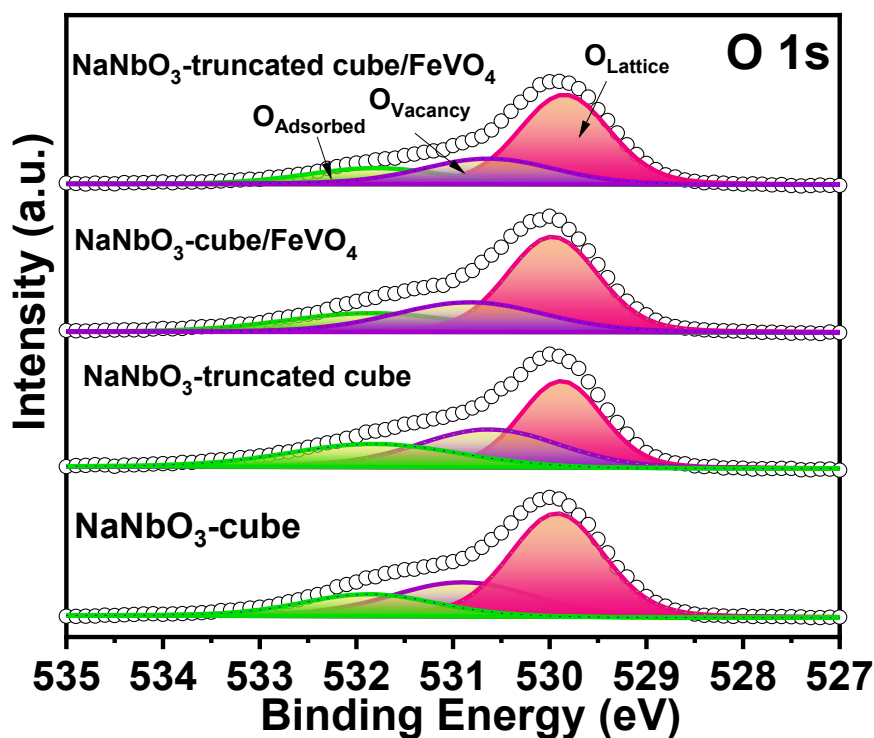

**Figure S11:** XPS deconvoluted spectra of O 1s in the synthesized photoelectrocatalysts.

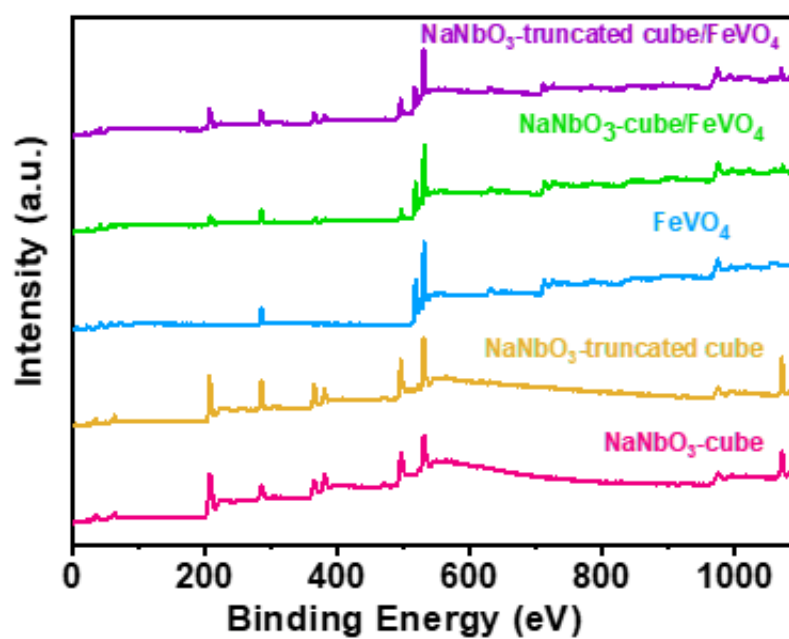

Figure S12: XPS survey spectra of the synthesized samples.

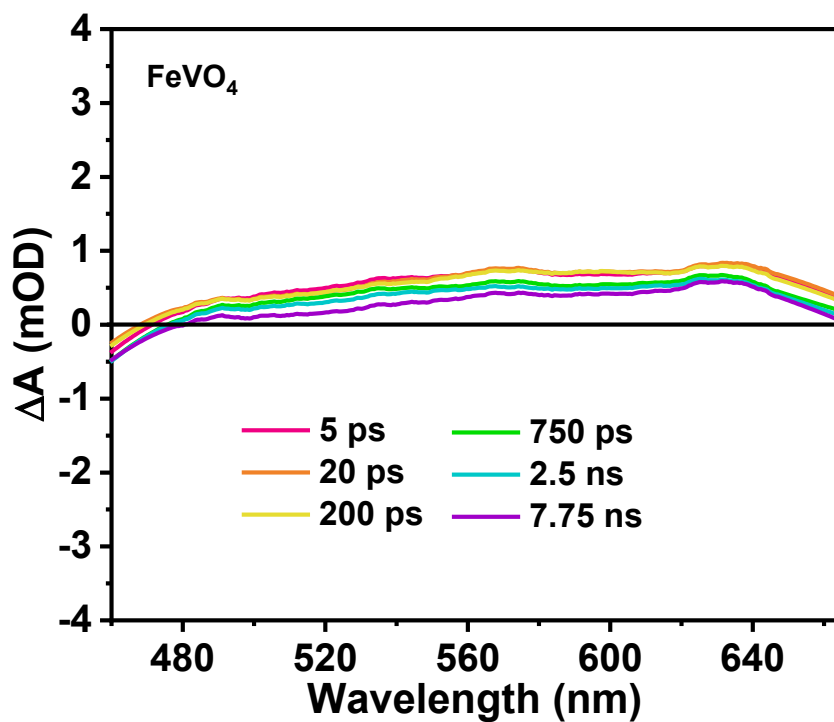

Figure S13: Ultrafast transient absorption spectra of  $\text{FeVO}_4$  at different time delays after the 350 nm laser pump excitation.

**Table S2:** Ultrafast transient absorption spectroscopy fitted lifetime components and their relative contributions for the synthesized samples.

| S. No. | Material                                                | $\tau_1$ (ps)    | $\tau_2$ (ps)  | $\tau_3$ (ps)   | $\tau_4$ (ps)    |
|--------|---------------------------------------------------------|------------------|----------------|-----------------|------------------|
| 1      | NaNbO <sub>3</sub> -cube                                | 0.369<br>(72.1%) | —              | 394<br>(12%)    | >8000<br>(15.9%) |
| 2      | NaNbO <sub>3</sub> -truncated cube                      | 0.379<br>(60.6%) | 122<br>(9.6%)  | 1300<br>(13%)   | >8000<br>(16.8%) |
| 3      | NaNbO <sub>3</sub> -cube/FeVO <sub>4</sub>              | 0.414<br>(57.2%) | 94<br>(7.1%)   | 2840<br>(18.8%) | >8000<br>(16.8%) |
| 4      | NaNbO <sub>3</sub> -truncated<br>cube/FeVO <sub>4</sub> | 0.575<br>(45%)   | 41.1<br>(8.4%) | 5630<br>(14%)   | >8000<br>(32.6%) |

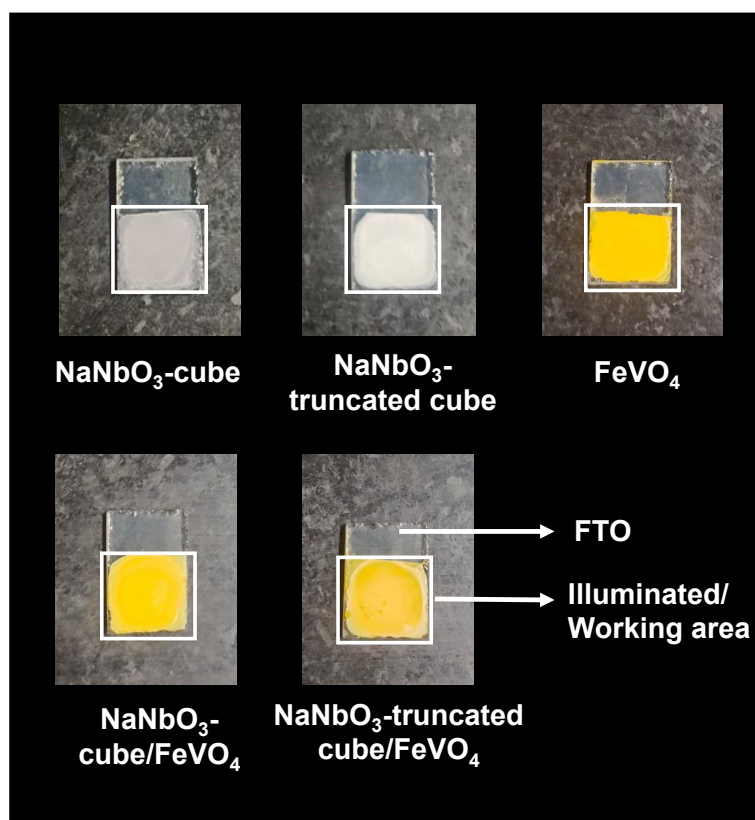

**Figure S14:** Digital photographs of all the electrodes.

**Table S3:** Comparison of current density values of the synthesized catalysts measured under dark and illuminated conditions at 1.7 V *vs.* RHE, along with ABPE values evaluated at 1.1 V *vs.* RHE.

| <b>Catalyst</b>                                      | <b><math>J_{\text{dark}}</math> (mA cm<sup>-2</sup>)</b> | <b><math>J_{\text{light}}</math> (mA cm<sup>-2</sup>)</b> | <b><math>J_{\text{light}} - J_{\text{dark}}</math> (mA cm<sup>-2</sup>)</b> | <b>ABPE (%)</b>      |
|------------------------------------------------------|----------------------------------------------------------|-----------------------------------------------------------|-----------------------------------------------------------------------------|----------------------|
| NaNbO <sub>3</sub> -cube                             | 0.100                                                    | 0.103                                                     | 0.003                                                                       | $1.3 \times 10^{-4}$ |
| NaNbO <sub>3</sub> -truncated cube                   | 0.237                                                    | 0.255                                                     | 0.094                                                                       | 0.0023               |
| NaNbO <sub>3</sub> -cube/FeVO <sub>4</sub>           | 0.227                                                    | 0.377                                                     | 0.140                                                                       | 0.0035               |
| NaNbO <sub>3</sub> -truncated cube/FeVO <sub>4</sub> | 0.200                                                    | 0.747                                                     | 0.547                                                                       | 0.0165               |

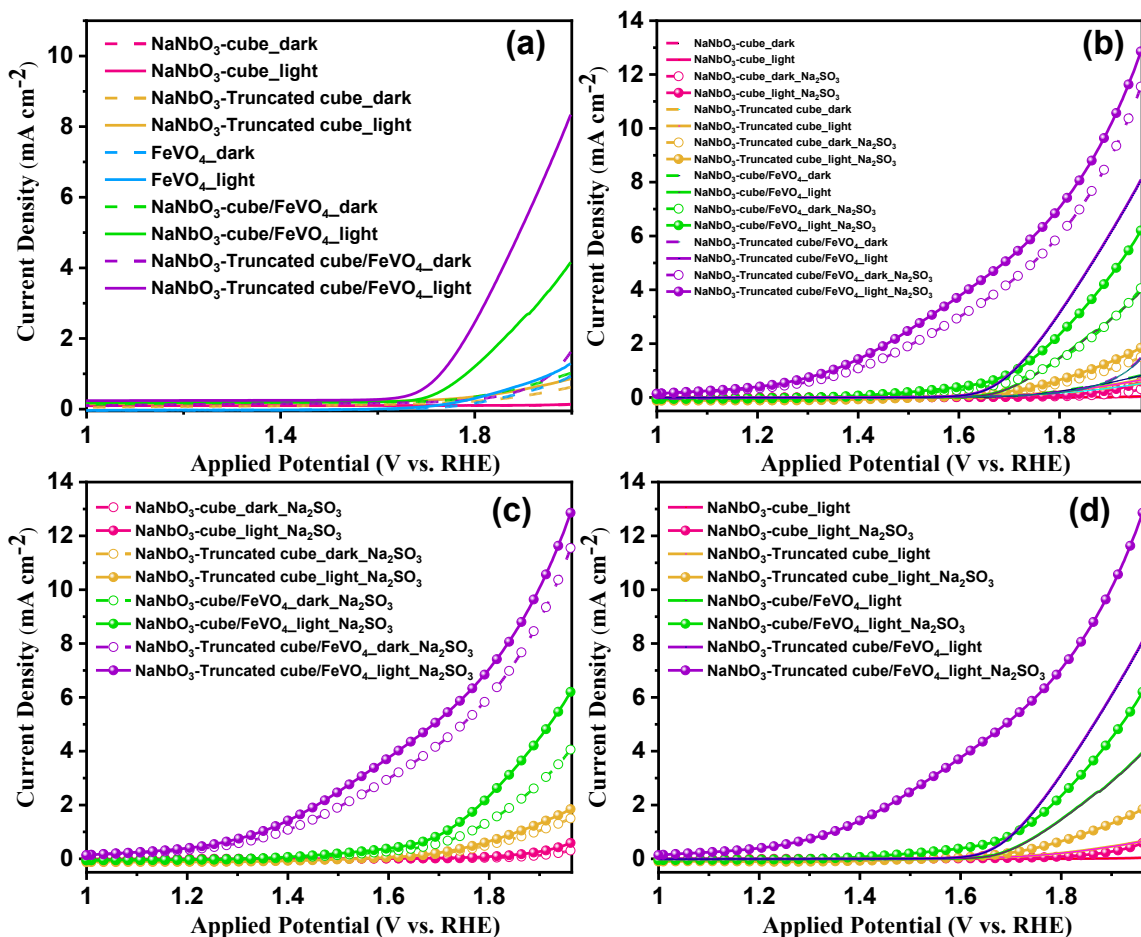

**Figure S15:** Polarization curves obtained from linear sweep voltammetry (LSV) measurements of the synthesized photoelectrodes recorded in the dark and under illumination. (a) Faceted- $\text{NaNbO}_3$ ,  $\text{FeVO}_4$ , and faceted- $\text{NaNbO}_3/\text{FeVO}_4$  in KOH, (b) faceted- $\text{NaNbO}_3$  and faceted- $\text{NaNbO}_3/\text{FeVO}_4$  in KOH and  $\text{Na}_2\text{SO}_3$ , (c) faceted- $\text{NaNbO}_3$  and faceted  $\text{NaNbO}_3/\text{FeVO}_4$  in  $\text{Na}_2\text{SO}_3$ , and (d) faceted- $\text{NaNbO}_3$  and faceted- $\text{NaNbO}_3/\text{FeVO}_4$  in KOH and  $\text{Na}_2\text{SO}_3$  under illumination.

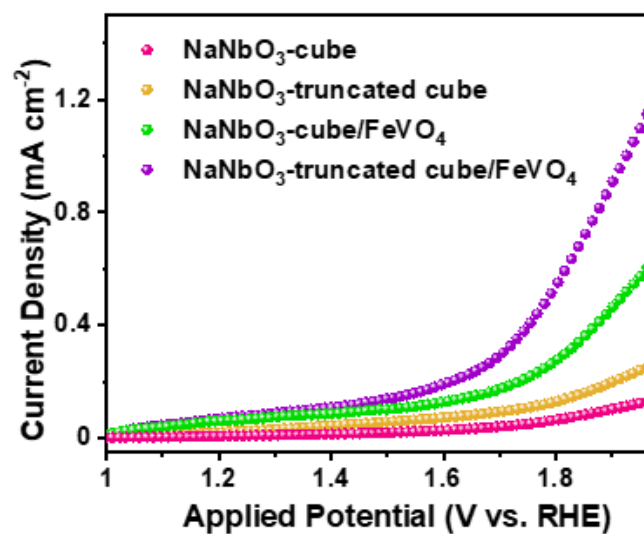

Figure S16: LSV plot of synthesized photoelectrodes in 0.5 M  $\text{Na}_2\text{SO}_4$  under illumination.

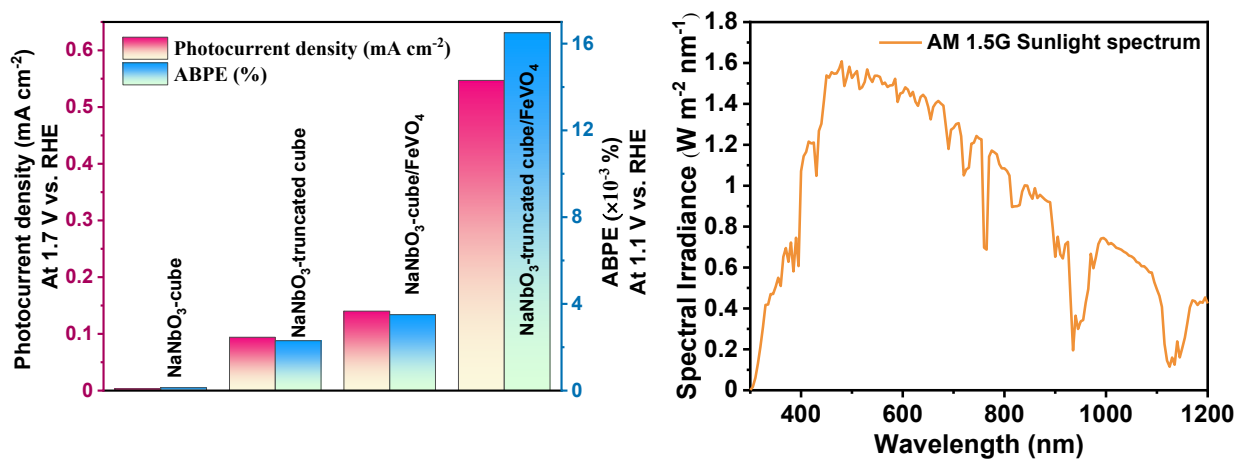

Figure S17: (a) Photocurrent density at 1.7 V *vs.* RHE and ABPE at 1.1 V *vs.* RHE comparison of the synthesized photoelectrodes and (b) light harvesting efficiency of AM 1.5 G solar simulator.

**Table S4:** Comparison of onset potential ( $V_{\text{op}}$ ) of the synthesized catalysts measured under dark and illuminated conditions at  $0.5 \text{ mA cm}^{-2}$ .

| Catalyst                                             | $V_{\text{op,dark}}$ (V <i>vs.</i> RHE) | $V_{\text{op,light}}$ (V <i>vs.</i> RHE) |
|------------------------------------------------------|-----------------------------------------|------------------------------------------|
| NaNbO <sub>3</sub> -cube                             | 1.92                                    | 1.87                                     |
| NaNbO <sub>3</sub> -truncated cube                   | 1.90                                    | 1.84                                     |
| NaNbO <sub>3</sub> -cube/FeVO <sub>4</sub>           | 1.85                                    | 1.72                                     |
| NaNbO <sub>3</sub> -truncated cube/FeVO <sub>4</sub> | 1.88                                    | 1.68                                     |

**Table S5:** Comparison of charge separation and charge transfer efficiencies of the synthesized catalysts at 1.8 V *vs.* RHE.

| Catalyst                                             | $\eta_{\text{separation}}$ (%) | $\eta_{\text{transfer}}$ (%) |
|------------------------------------------------------|--------------------------------|------------------------------|
| NaNbO <sub>3</sub> -cube                             | 13.36                          | 2.03                         |
| NaNbO <sub>3</sub> -truncated cube                   | 17.19                          | 6.08                         |
| NaNbO <sub>3</sub> -cube/FeVO <sub>4</sub>           | 26.34                          | 23.74                        |
| NaNbO <sub>3</sub> -truncated cube/FeVO <sub>4</sub> | 36.76                          | 51.69                        |

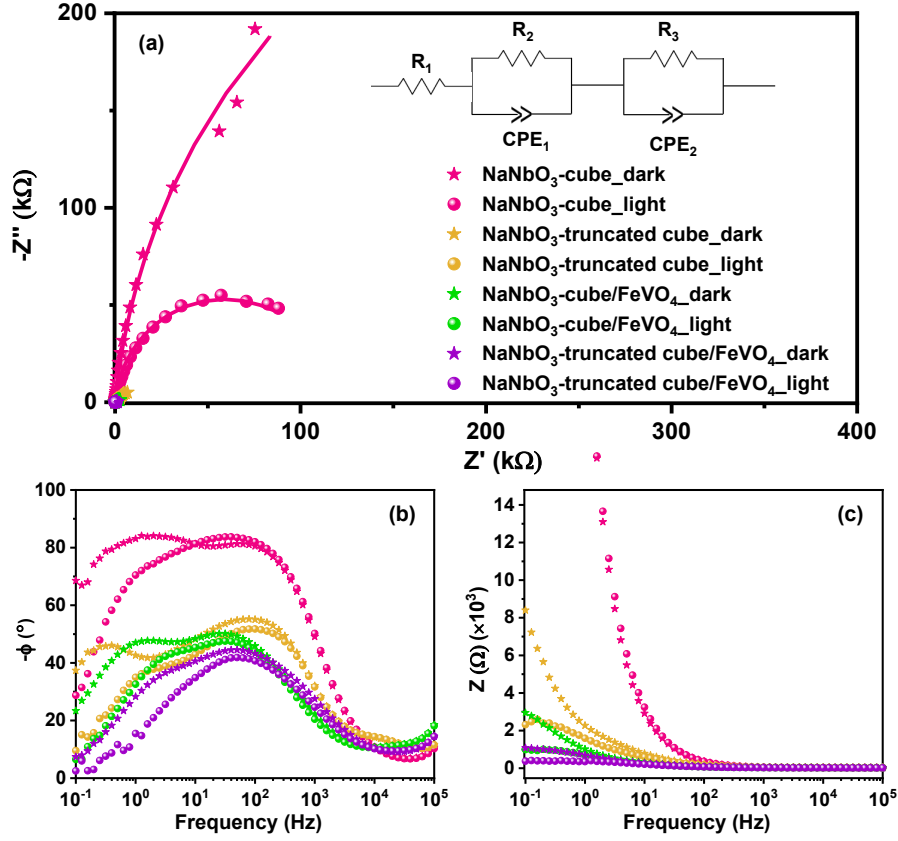

**Figure S18:** (a) Nyquist plot (inset: equivalent circuit fitted), (b) Bode phase, and (c) Bode impedance plots derived from EIS of the synthesized photoelectrocatalysts.

**Table S6:** EIS fitting parameters obtained for NaNbO<sub>3</sub>-based photoelectrocatalysts under dark and illuminated conditions.

| Synthesized Photoelectrocatalyst                             | $R_1$ ( $\Omega$ ) | $R_2$ ( $\Omega$ ) | $R_3$ ( $\Omega$ ) |
|--------------------------------------------------------------|--------------------|--------------------|--------------------|
| NaNbO <sub>3</sub> -cube (dark)                              | 50.96              | 868.53             | 120432.71          |
| NaNbO <sub>3</sub> -cube (light)                             | 45.83              | 717.42             | 7106.19            |
| NaNbO <sub>3</sub> -truncated cube (dark)                    | 49.99              | 865.36             | 14794.78           |
| NaNbO <sub>3</sub> -truncated cube (light)                   | 28.84              | 700.52             | 3106.19            |
| NaNbO <sub>3</sub> -cube/FeVO <sub>4</sub> (dark)            | 20.65              | 385.59             | 3335.67            |
| NaNbO <sub>3</sub> -cube/FeVO <sub>4</sub> (light)           | 19.64              | 150.65             | 1102.28            |
| NaNbO <sub>3</sub> -truncated cube/FeVO <sub>4</sub> (dark)  | 19.94              | 140.72             | 398.59             |
| NaNbO <sub>3</sub> -truncated cube/FeVO <sub>4</sub> (light) | 13.47              | 90.39              | 102.05             |

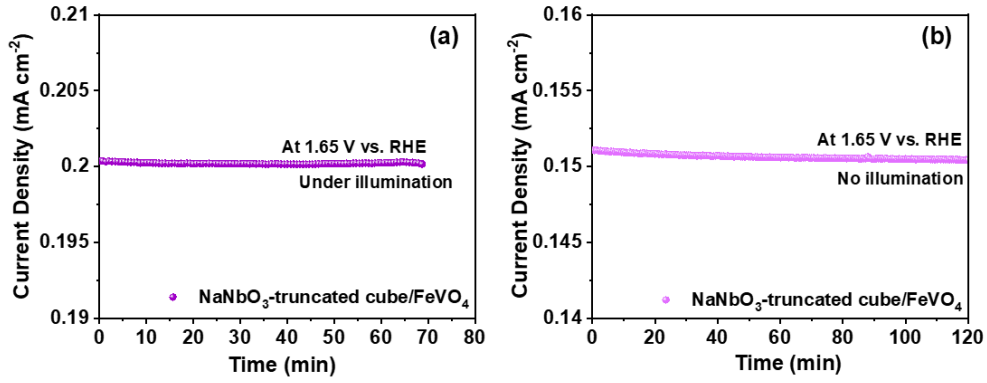

**Figure S19:** Long-term stability test of NaNbO<sub>3</sub>-truncated cube/FeVO<sub>4</sub> at 1.65 V vs. RHE (a) under illumination and (b) no illumination.

**Table S7:** Characteristic peaks observed in the DRT profiles and their associated electrochemical processes.

| Peak | Process                          | Time constant            | Typical origin                   | Description                                                                         |
|------|----------------------------------|--------------------------|----------------------------------|-------------------------------------------------------------------------------------|
| P1   | Interfacial / ohmic contribution | $< 10^{-3}$ s            | Electrode/ electrolyte interface | Represents fast processes arising from ohmic and interfacial contributions.         |
| P2   | Charge-transfer kinetics         | $10^{-3}$ to $10^{-1}$ s | Surface reaction sites           | Corresponds to charge-transfer processes associated with electrochemical reactions. |
| P3   | Ion-diffusion process            | $> 10^{-1}$ s            | Bulk electrolyte / electrode     | Represents slower ion-diffusion processes within the electrode and electrolyte.     |

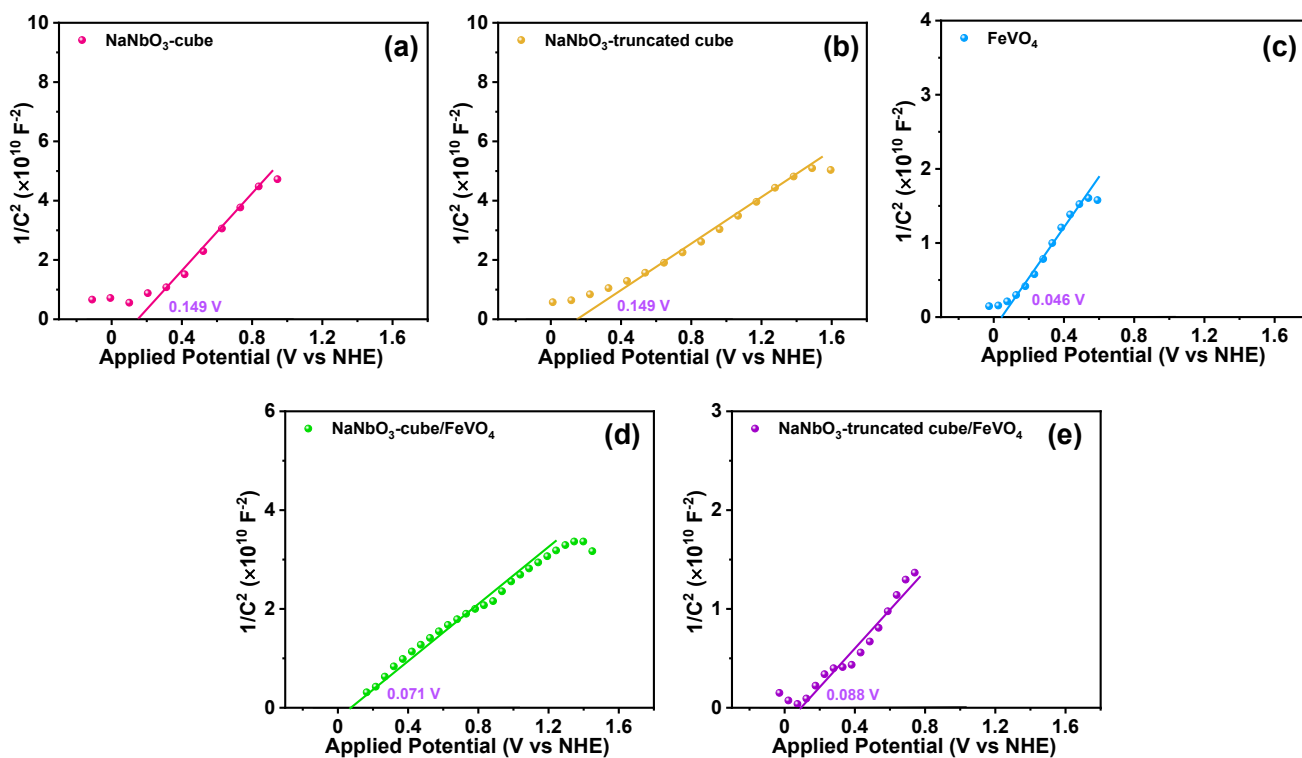

**Figure S20:** Mott-Schottky plots of (a)  $\text{NaNbO}_3$ -cube, (b)  $\text{NaNbO}_3$ -truncated cube, (c)  $\text{FeVO}_4$ , (d)  $\text{NaNbO}_3$ -cube/ $\text{FeVO}_4$ , and (e)  $\text{NaNbO}_3$ -truncated cube/ $\text{FeVO}_4$ .

**Table S8:** Charge carrier density and flat band potential values of the synthesized catalysts evaluated from Mott-Schottky plots.

| Catalyst                                             | Charge carrier density, $N_D$ ( $\text{cm}^{-3}$ ) |
|------------------------------------------------------|----------------------------------------------------|
| NaNbO <sub>3</sub> -cube                             | $1.02 \times 10^{19}$                              |
| NaNbO <sub>3</sub> -truncated cube                   | $1.88 \times 10^{19}$                              |
| NaNbO <sub>3</sub> -cube/FeVO <sub>4</sub>           | $2.62 \times 10^{19}$                              |
| NaNbO <sub>3</sub> -truncated cube/FeVO <sub>4</sub> | $3.54 \times 10^{19}$                              |

**Table S9:** Comparative photoelectrochemical performance of the investigated photoanodes.

| S. No. | Photoanode                                                                          | $J_{ph}$                                                                                           | Electrolyte                                                                    | Reference |
|--------|-------------------------------------------------------------------------------------|----------------------------------------------------------------------------------------------------|--------------------------------------------------------------------------------|-----------|
| 1      | CdS/NaNbO <sub>3</sub> -nanorods                                                    | 7.6 mA cm <sup>-2</sup> at 0.2 V vs. SHE                                                           | 0.1 M Na <sub>2</sub> S and 0.14 M Na <sub>2</sub> SO <sub>3</sub> (pH ~ 12.4) | [1]       |
| 2      | NaNbO <sub>3</sub> @CuS                                                             | 4.87 mA cm <sup>-2</sup> at -0.648 V vs. Ag/AgCl                                                   | Na <sub>2</sub> SO <sub>4</sub> (pH ~ 7)                                       | [2]       |
| 3      | NaNbO <sub>3</sub> /Ag <sub>2</sub> S                                               | 2.44 mA cm <sup>-2</sup> at 0.9 V vs. Ag/AgCl                                                      | 0.5 M Na <sub>2</sub> SO <sub>4</sub> (pH ~ 7)                                 | [3]       |
| 4      | g-C <sub>3</sub> N <sub>4</sub> /NaNbO <sub>3</sub> -nanofiber                      | 12.55 mA cm <sup>-2</sup> at 1 V vs. Ag/AgCl                                                       | 0.5 M NaOH (pH ~ 14)                                                           | [4]       |
| 5      | [110]-ZnO/CdS/CdSe                                                                  | 4.40 mA cm <sup>-2</sup> at 0 V vs. SCE                                                            | 0.25 M Na <sub>2</sub> S and 0.35 M Na <sub>2</sub> SO <sub>3</sub>            | [5]       |
| 6      | Selectively exposed TiO <sub>2</sub> (sTO); sTO(101), sTO(100), and sTO(001)        | 0.13, 0.07, and 0.02 mA cm <sup>-2</sup> at 0.65 V vs. Ag/AgCl                                     | 0.5 M Na <sub>2</sub> SO <sub>4</sub>                                          | [6]       |
| 7      | (040) BiVO <sub>4</sub>                                                             | 1.26 mA cm <sup>-2</sup> at 1.23 V vs. RHE                                                         | pH ~ 7                                                                         | [7]       |
| 8      | cubic-Cu <sub>2</sub> O and concave octahedral-Cu <sub>2</sub> O                    | -0.6 mA cm <sup>-2</sup> and -0.75 mA cm <sup>-2</sup> at 0 V vs. RHE                              | 0.1 M Na <sub>2</sub> SO <sub>4</sub>                                          | [8]       |
| 9      | (040)-BiVO <sub>4</sub>                                                             | 0.29 mA cm <sup>-2</sup> at 1.8 V vs. RHE                                                          | 0.1 M NaOH                                                                     | [9]       |
| 10     | {110}-BiVO <sub>4</sub> , {010}-BiVO <sub>4</sub> and {110}/{010}-BiVO <sub>4</sub> | 0.68 mA cm <sup>-2</sup> , 0.51 mA cm <sup>-2</sup> and 0.31 mA cm <sup>-2</sup> at 1.23 V vs. RHE | 1 M KBi                                                                        | [10]      |
| 11     | NaNbO <sub>3</sub> -cube                                                            | 0.01 mA cm <sup>-2</sup> at 1.9 V vs. RHE                                                          | 0.1 M KOH                                                                      | This work |
| 12     | NaNbO <sub>3</sub> -truncated cube                                                  | 0.19 mA cm <sup>-2</sup> at 1.9 V vs. RHE                                                          | 0.1 M KOH                                                                      | This work |
| 13     | NaNbO <sub>3</sub> -cube/FeVO <sub>4</sub>                                          | 1.84 mA cm <sup>-2</sup> at 1.9 V vs. RHE                                                          | 0.1 M KOH                                                                      | This work |
| 14     | NaNbO <sub>3</sub> -truncated cube/FeVO <sub>4</sub>                                | 4.68 mA cm <sup>-2</sup> at 1.9 V vs. RHE                                                          | 0.1 M KOH                                                                      | This work |

## References

- [1] K. K. Nanda, S. Swain, B. Satpati, L. Besra and Y. S. Chaudhary, *RSC advances*, 2014, **4**, 10928–10934.
- [2] S. Kumar and A. K. Ganguli, *Applied Surface Science Advances*, 2022, **9**, 100239.

- [3] S. Kumar, A. P. Singh, C. Bera, M. Thirumal, B. Mehta and A. K. Ganguli, *ChemSusChem*, 2016, **9**, 1850–1858.
- [4] D. Kumar, S. Sharma and N. Khare, *Nanotechnology*, 2020, **31**, 135402.
- [5] J. Ma, S. Su, W. Fu, H. Yang, X. Zhou, H. Yao, Y. Chen, L. Yang, M. Sun, Y. Mu *et al.*, *CrystEngComm*, 2014, **16**, 2910–2916.
- [6] C. W. Kim, S. J. Yeob, H.-M. Cheng and Y. S. Kang, *Energy & Environmental Science*, 2015, **8**, 3646–3653.
- [7] L. Xia, J. Li, J. Bai, L. Li, S. Chen and B. Zhou, *Nano-Micro Letters*, 2018, **10**, 11.
- [8] C. Liu, Y.-H. Chang, J. Chen and S.-P. Feng, *ACS applied materials & interfaces*, 2017, **9**, 39027–39033.
- [9] Rashmi, M. D. Gyanprakash, M. Gadhewal, R. G. S. Pala and S. Sivakumar, *The Journal of Physical Chemistry C*, 2022, **126**, 16477–16491.
- [10] D. Li, R. Chen, P. Wang, Z. Li, J. Zhu, F. Fan, J. Shi and C. Li, *ChemCatChem*, 2019, **11**, 3763–3769.
